# Supplementary material for: Coagulopathy in patients with COVID-19: a systematic review and meta-analysis
Source: publisher site journal article supplement (doi:10.18632/aging.104138), 2020-11-21
Supplement: Supplementary file [file aging-v12i24-104138-supplementary-material-SD1.pdf]

SUPPLEMENTARY FIGURE

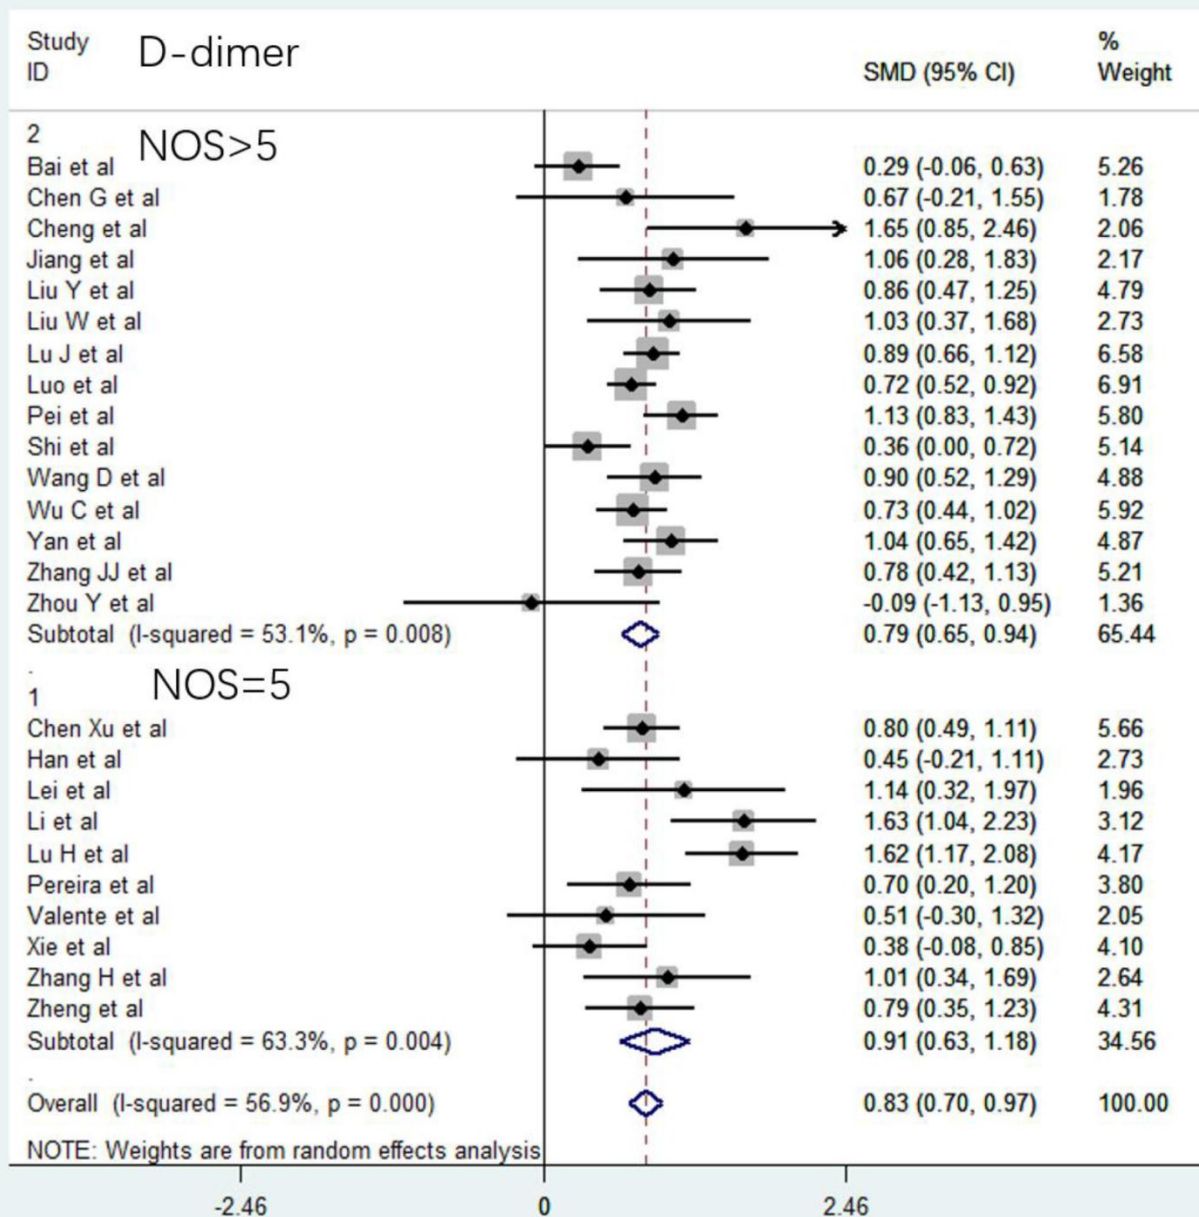

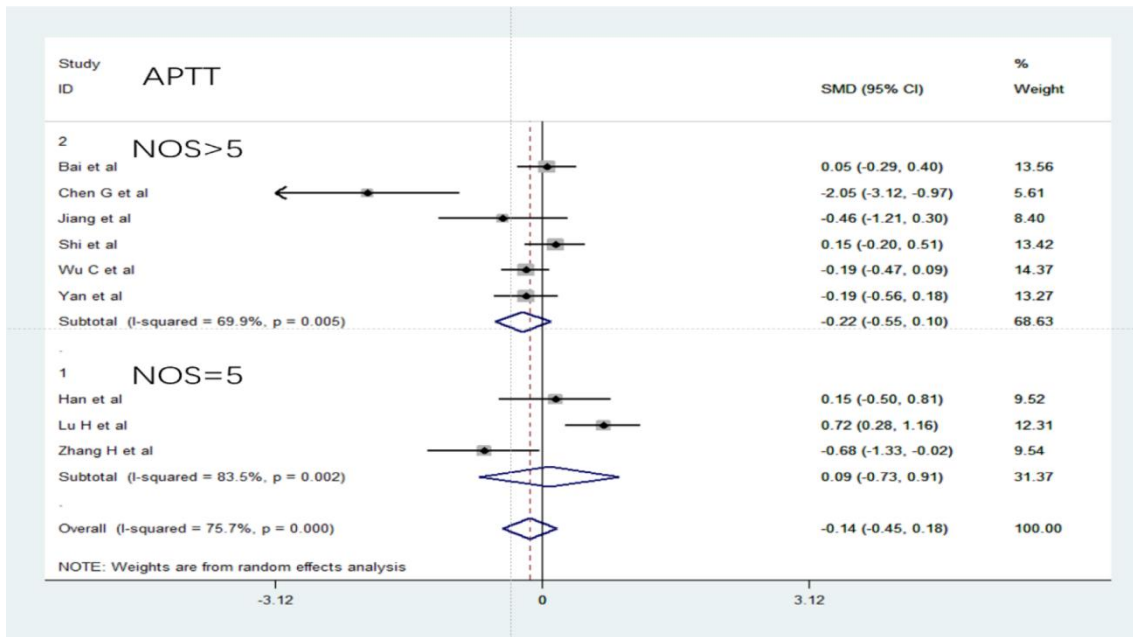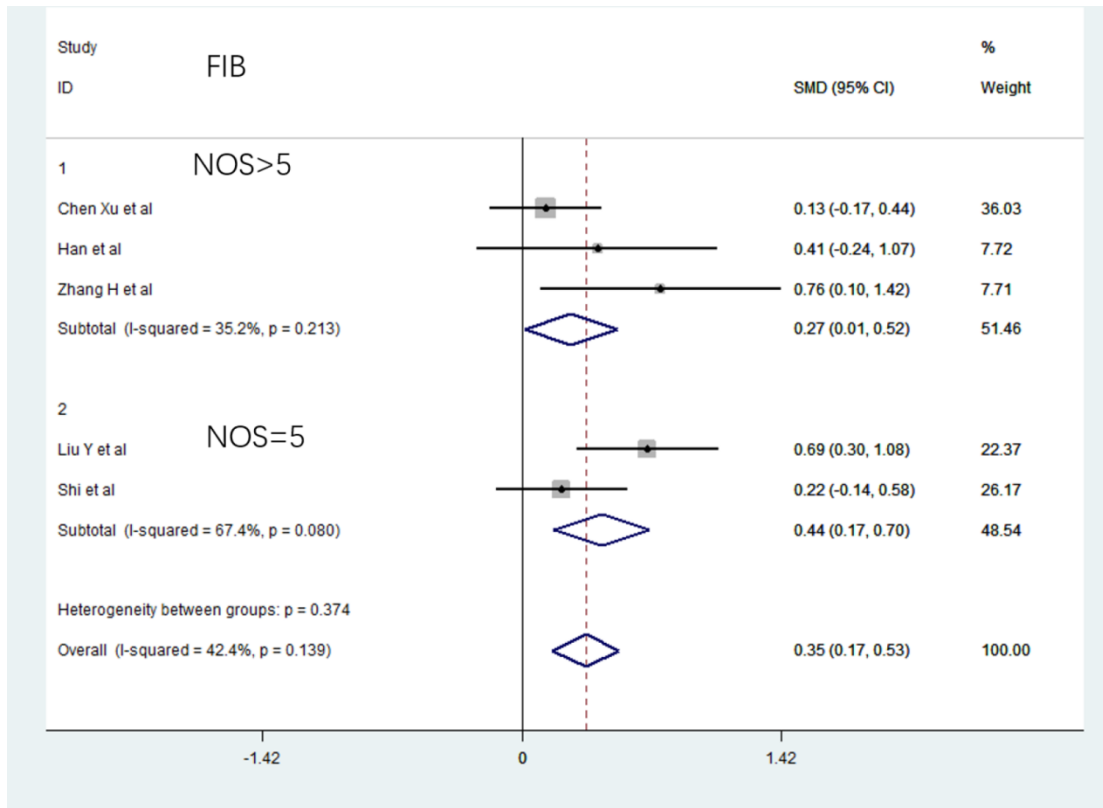

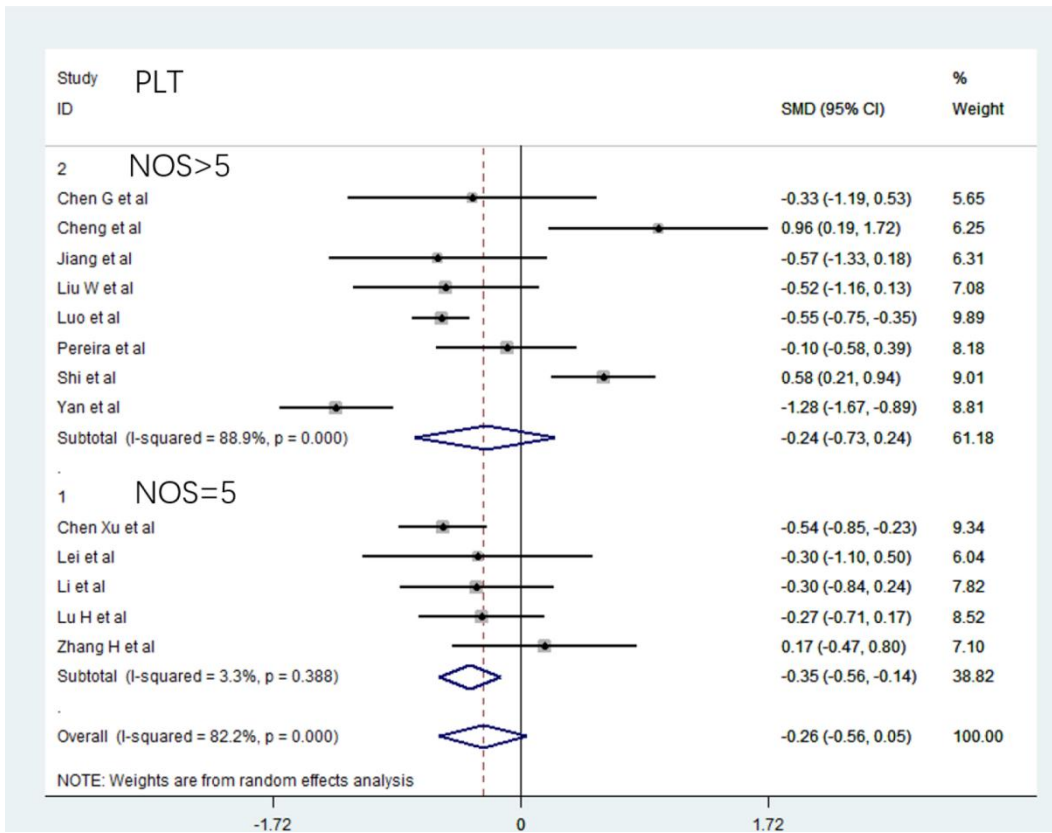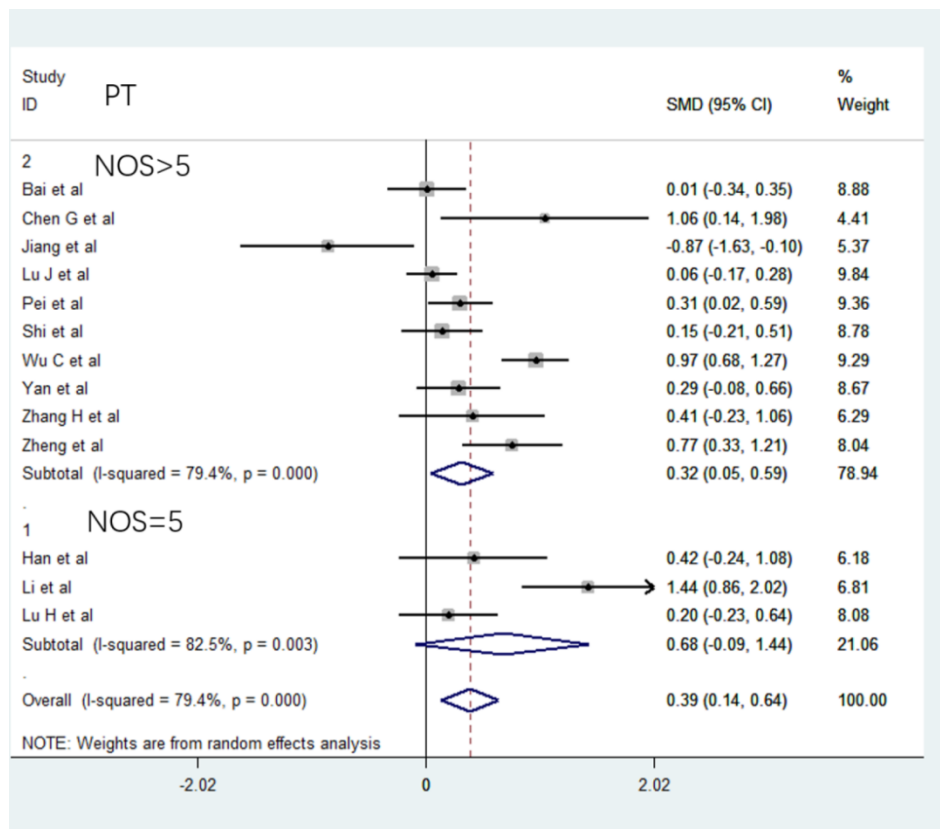

Supplementary Figure 1. Subgroup analyses of the association between D-dimer, PLT, PT, APTT in patients with COVID-19 stratified by disease severity according to NOS > 5 and NOS = 5.
